# Supplementary material for: A Minimally Invasive, Translational Method to Deliver Hydrogels to the Heart Through the Pericardial Space
Source: PubMed Central journal article supplement — JACC Basic Transl Sci. 2017 Oct 4;2(5):601–9. doi: 10.1016/j.jacbts.2017.06.003 (PMC6058920; doi:10.1016/j.jacbts.2017.06.003), 2017-10-04
Supplement: mmc1.pdf [file mmc1.pdf]

## **Supplemental Materials**

### **Full title:**

A minimally invasive, translational method to deliver hydrogels to the heart through the pericardial space

### **Authors:**

Jose R. Garcia MS<sup>1</sup>, Peter F. Campbell MD<sup>2</sup>, Gautam Kumar MBBS<sup>3,4</sup>, Jonathan J. Langberg MD<sup>3</sup>, Liliana Cesar DVM<sup>5</sup>, Lanfang Wang MS<sup>3</sup>, Andrés J. García PhD<sup>1</sup>, Rebecca D. Levit MD<sup>3</sup>

### **Affiliations:**

- (1) Woodruff School of Mechanical Engineering, Petit Institute for Bioengineering and Bioscience, Georgia Institute of Technology, Atlanta, GA
- (2) Innovatië LifeSciences, Santa Clara, CA
- (3) Division of Cardiology, Department of Medicine, Emory University School of Medicine, Atlanta, GA
- (4) Division of Cardiology, Atlanta VA Medical Center, Atlanta, GA
- (5) T3 Labs-Translational, Testing and Training Laboratories, Inc., Atlanta, GA

### **Address for correspondence:**

Rebecca D. Levit, MD  
101 Woodruff Circle  
Woodruff Memorial Building, Rm 315  
Atlanta, GA 30322  
(t) 404-712-9550  
(f) 404-727-3585  
[rlevit@emory.edu](mailto:rlevit@emory.edu)

**Figure:**

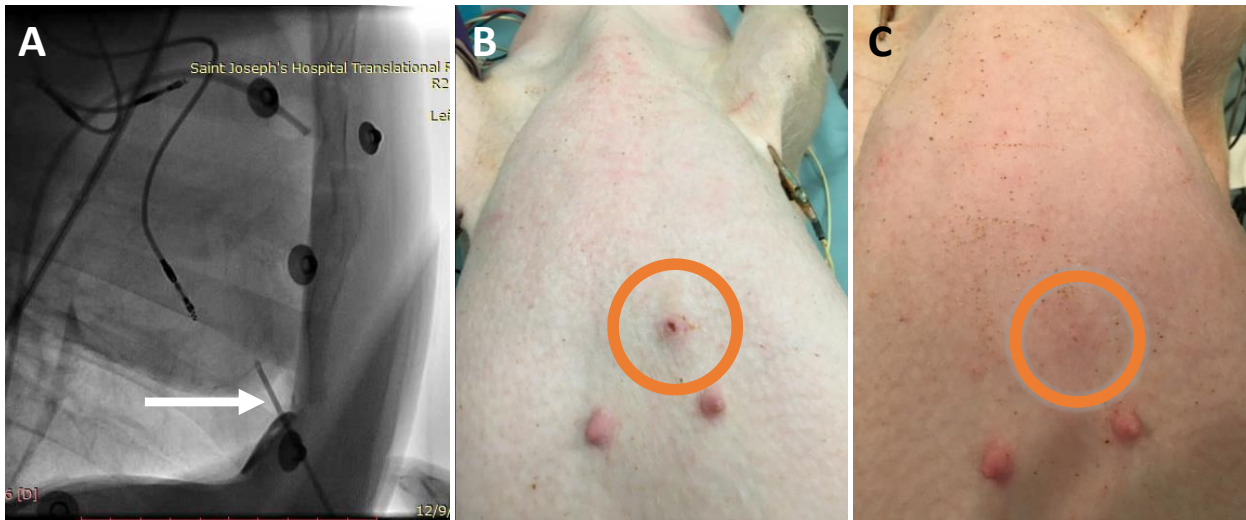

**Supplemental Figure 1: Percutaneous sub-xiphoid pericardial access was minimally invasive leaving undetectable scar after 2 weeks.** The pericardial space was accessed by micro-puncture needle from a sub-xiphoid approach (A). Needle (A, arrow) was guided by fluoroscopy placed in extreme lateral position. After 1 (B) and 2 (C) weeks, external scar had healed in all pigs (n=9). Animals were immediately mobile after the procedure.

**Tables:**

**Supplemental Table 1: Invasive hemodynamic parameters before gel placement, immediately after gel placement, and after 4-6 weeks.** Invasive hemodynamic measurements showed no elevation in heart rate nor filling pressures to suggest elevated pericardial pressure, constriction, nor tamponade.

|                            | Heart rate<br>(bpm) | Right atrial<br>(mmHg) | RV peak<br>(mmHg) | RV diastolic<br>(mmHg) | Wedge<br>(mmHg) | LV peak<br>(mmHg) | LV diastolic<br>(mmHg) |
|----------------------------|---------------------|------------------------|-------------------|------------------------|-----------------|-------------------|------------------------|
|                            | mean SD             | mean SD                | mean SD           | mean SD                | mean SD         | mean SD           | mean SD                |
| <b>Pre-gel</b>             | 92.8 ± 17.4         | 4.6 ± 2.3              | 21.1 ± 4.6        | 2.8 ± 2.4              | 7.9 ± 1.8       | 68.0 ± 5.8        | 6.6 ± 1.6              |
| <b>Post-gel, acute</b>     | 76.6 ± 16.8         | 6.3 ± 1.4              | 23.8 ± 5.1        | 4.3 ± 2.8              | 8.5 ± 2.5       | 65.6 ± 4.5        | 6.7 ± 1.5              |
| <b>Post-gel, 4-6 weeks</b> | 78.8 ± 16.1         | 5.6 ± 1.8              | 23.1 ± 3.6        | 3.0 ± 2.5              | 7.6 ± 2.9       | 69.4 ± 3.9        | 5.5 ± 2.8              |
|                            | 95% CI              | 95% CI                 | 95% CI            | 95% CI                 | 95% CI          | 95% CI            | 95% CI                 |
| <b>Pre-gel</b>             | 78.2-107.3          | 2.7-6.6                | 17.3-25.0         | 0.8-4.7                | 6.4-9.4         | 62.7-73.3         | 5.2-8.0                |
| <b>Post-gel, acute</b>     | 62.5-90.7           | 5.1-7.4                | 19.4-28.1         | 1.9-6.6                | 6.5-10.6        | 61.4-69.8         | 5.5-8.0                |
| <b>Post-gel, 4-6 weeks</b> | 65.3-92.26          | 4.2-7.1                | 20.2-26.1         | 0.9-5.1                | 5.2-10.1        | 65.8-73.0         | 3.2-7.8                |

**Supplemental Table 2: White blood cell counts and serum markers of liver and kidney function 4 weeks after gel placement.** Total white blood cell count, lymphocyte count, and neutrophil count remain stable or decline in all animals suggesting no overt inflammatory response. Liver and kidney function serum markers are stable after pericardial hydrogel delivery.

| Animal ID | White blood cell count (x 10 <sup>9</sup> /L) |         |                        |         |                        | Lymphocytes (x 10 <sup>9</sup> /L) |         |                        |         |                        | Neutrophils (x 10 <sup>9</sup> /L) |         |                        |         |                        |
|-----------|-----------------------------------------------|---------|------------------------|---------|------------------------|------------------------------------|---------|------------------------|---------|------------------------|------------------------------------|---------|------------------------|---------|------------------------|
|           | Baseline                                      | 2 weeks | $\Delta$ from baseline | 4 weeks | $\Delta$ from baseline | Baseline                           | 2 weeks | $\Delta$ from baseline | 4 weeks | $\Delta$ from baseline | Baseline                           | 2 weeks | $\Delta$ from baseline | 4 weeks | $\Delta$ from baseline |
| 1         | 23.1                                          | 17.3    | -5.8                   | 11.2    | -11.9                  | 13.9                               | 8.5     | -5.4                   | 4.6     | -9.3                   | 8.1                                | 7.6     | -0.5                   | 6.1     | -2                     |
| 2         | 11.9                                          | 12.7    | 0.8                    | 12.4    | 0.5                    | 6.7                                | 6.4     | -0.3                   | 6.3     | -0.4                   | 4.7                                | 6       | 1.3                    | 5.2     | 0.5                    |
| 3         | 17.28                                         | 15.74   | -1.54                  | 13.49   | -3.79                  | 9.55                               | 10.56   | 1.01                   | 9.02    | -0.53                  | 7.64                               | 5.09    | -2.55                  | 4.37    | -3.27                  |
| 4         | 12.93                                         | 9.37    | -3.56                  | 9.79    | -3.14                  | 8.51                               | 5.91    | -2.6                   | 6.58    | -1.93                  | 4.36                               | 3.36    | -1                     | 3.16    | -1.2                   |
| 5         | 15.69                                         | 11.32   | -4.37                  | 11.6    | -4.09                  | 10.78                              | 5.45    | -5.33                  | 6.36    | -4.42                  | 4.82                               | 4.76    | -0.06                  | 3.86    | -0.96                  |
| 6         | 15.75                                         | 14.18   | -1.57                  | 16.49   | 0.74                   | 10.04                              | 9.51    | -0.53                  | 16.49   | 6.45                   | 5.64                               | 4.61    | -1.03                  | 7.97    | 2.33                   |
| 7         | 10.07                                         | 10.38   | 0.31                   | 10.09   | 0.02                   | 7.71                               | 7.24    | -0.47                  | 6.75    | -0.96                  | 2.29                               | 3.07    | 0.78                   | 3.28    | 0.99                   |
| 8         | 7.58                                          | 6.49    | -1.09                  | 8.13    | 0.55                   | 3.72                               | 6.49    | 2.77                   | 5.33    | 1.61                   | 2.97                               | 1.6     | -1.37                  | 2.27    | -0.7                   |
| mean      | 14.3                                          | 12.2    | -2.1                   | 11.6    | -2.6                   | 8.9                                | 7.5     | -1.4                   | 7.7     | -1.2                   | 5.1                                | 4.5     | -0.6                   | 4.5     | -0.5                   |
| SD        | 4.49                                          | 3.31    | 2.14                   | 2.39    | 4.00                   | 2.82                               | 1.71    | 2.71                   | 3.54    | 4.24                   | 1.90                               | 1.73    | 1.15                   | 1.72    | 1.65                   |

  

| Animal ID | Alanine aminotransferase (U/L) |         |                        |         |                        | Total bilirubin (mg/dL) |         |                        |         |                        | Creatinine (mg/dL) |         |                        |         |                        |
|-----------|--------------------------------|---------|------------------------|---------|------------------------|-------------------------|---------|------------------------|---------|------------------------|--------------------|---------|------------------------|---------|------------------------|
|           | Baseline                       | 2 weeks | $\Delta$ from baseline | 4 weeks | $\Delta$ from baseline | Baseline                | 2 weeks | $\Delta$ from baseline | 4 weeks | $\Delta$ from baseline | Baseline           | 2 weeks | $\Delta$ from baseline | 4 weeks | $\Delta$ from baseline |
| 1         | 34                             | 36      | 2                      | 26      | -8                     | 0.1                     | 0.1     | 0                      | 0.1     | 0                      | 0.9                | 1       | 0.1                    | 1       | 0.1                    |
| 2         | 56                             | 49      | -7                     | 49      | -7                     | 0.1                     | 0.1     | 0                      | 0.1     | 0                      | 1.2                | 1.1     | -0.1                   | 1.3     | 0.1                    |
| 3         | 44                             | 49      | 5                      | 43      | -1                     | 0.3                     | 0.2     | -0.1                   | 0.2     | -0.1                   | 1.8                | 1.4     | -0.4                   | 1.8     | 0                      |
| 4         | 43                             | 42      | -1                     | 43      | 0                      | 0.3                     | 0.3     | 0                      | 0.3     | 0                      | 1                  | 1.7     | 0.7                    | 1.6     | 0.6                    |
| 5         | 64                             | 61      | -3                     | 75      | 11                     | 0.2                     | 0.2     | 0                      | 0.2     | 0                      | 2.4                | 1.7     | -0.7                   | 2.2     | -0.2                   |
| 6         | 56                             | 74      | 18                     | 65      | 9                      | 0.2                     | 0.2     | 0                      | 0.2     | 0                      | 1.6                | 1.8     | 0.2                    | 1.5     | -0.1                   |
| 7         | 53                             | 71      | 18                     | 61      | 8                      | 0.2                     | 0.2     | 0                      | 0.2     | 0                      | 1.1                | 1.4     | 0.3                    | 1.4     | 0.3                    |
| 8         | 49                             | 47      | -2                     | 94      | 45                     | 0.4                     | 0.2     | -0.2                   | 0.2     | -0.2                   | 2                  | 1.7     | -0.3                   | 1.7     | -0.3                   |
| mean      | 49.9                           | 53.6    | 3.8                    | 57.0    | 7.1                    | 0.2                     | 0.2     | 0.0                    | 0.2     | 0.0                    | 1.5                | 1.5     | 0.0                    | 1.6     | 0.1                    |
| SD        | 8.80                           | 12.77   | 8.86                   | 19.97   | 15.81                  | 0.10                    | 0.06    | 0.07                   | 0.06    | 0.07                   | 0.50               | 0.28    | 0.41                   | 0.34    | 0.27                   |
